# Supplementary material for: Spanish Adaptation of the Parenting Practices Interview (PPI-25) for Families with Substantiated Reports or at Risk for Child Maltreatment
Source: Springer Nature journal article supplement (doi:10.1007/s10826-022-02300-6), 2022-04-06
Supplement: MOESM1 [file 20291994]

**Descriptive statistics for all 64 PPI items used in the analysis.**

|  |  | **N** | **Missing %** | **Mean** | **Sd** | ***s*** | ***k*** |
| --- | --- | --- | --- | --- | --- | --- | --- |
| **Appropriate Discipline** | |  |  |  |  |  |  |
| 1c | Misbehave: get child to correct problem | 213 | 0.0 | 4.6 | 1.6 | -0.2 | -0.8 |
| 1e | Misbehave: brief time out | 213 | 0.0 | 2.5 | 1.6 | 1.1 | 0.3 |
| 1g | Misbehave: take away privileges | 212 | 0.0 | 4.0 | 1.6 | 0.1 | -1.0 |
| 2e | Hit another child: brief time out | 213 | 0.0 | 2.5 | 1.9 | 1.1 | -0.1 |
| 2g | Hit another child: take away privileges | 212 | 0.0 | 4.3 | 2.0 | -0.3 | -1.2 |
| 3c | Refuse to do something: get child to correct problem | 213 | 0.0 | 4.6 | 1.7 | -0.6 | -0.4 |
| 3e | Refuse to do something: brief time out | 213 | 0.0 | 2.3 | 1.8 | 1.2 | 0.4 |
| 3g | Refuse to do something: take away privileges | 211 | 0.0 | 4.5 | 1.8 | -0.5 | -0.8 |
| 5b | Frequency of actually discipline | 210 | 0.0 | 5.1 | 1.6 | -0.8 | -0.3 |
| 11b | Child does not complete chores how likely to punish | 211 | 0.0 | 3.9 | 1.8 | 0.1 | -1.2 |
| 11c | Child fights how likely to punish | 212 | 0.0 | 5.2 | 1.9 | -1.0 | -0.3 |
| 15b | Parents who checkup are too anxious | 212 | 0.0 | 5.0 | 2.0 | -0.7 | -0.9 |
| **Positive Verbal Discipline** | |  |  |  |  |  |  |
| 1k | Misbehave: Discuss problem with child | 213 | 0.0 | 4.8 | 1.7 | -0.4 | -1.0 |
| 2c | Hit another child: get child to correct problem | 213 | 0.0 | 5.6 | 1.4 | -1.2 | 1.3 |
| 2k | Hit another child: Discuss problem with child | 213 | 0.0 | 5.5 | 1.7 | -1.3 | 1.0 |
| 3k | Refuse to do something: Discuss problem with child | 213 | 0.0 | 5.3 | 1.6 | -1.0 | 0.6 |
| 7 | Praise for good job | 209 | 0.0 | 3.6 | 1.2 | 0.6 | 0.4 |
| 8a | Praise/compliment last days | 212 | 0.0 | 4.1 | 1.7 | 0.1 | -0.8 |
| 9d | Important to praise | 212 | 0.0 | 6.4 | 1.1 | -3.0 | 11.0 |
| 9eR | Hard to find behaviors to praise | 211 | 0.0 | 4.2 | 2.0 | 0.0 | -1.4 |
| 11a | When child completes tasks how likely to praise | 212 | 0.0 | 5.5 | 1.3 | -0.9 | 0.7 |
| **Praise & Incentives** | |  |  |  |  |  |  |
| 6b | Praise or compliment | 212 | 0.0 | 6.0 | 1.3 | -1.6 | 2.8 |
| 6c | Give hug, kiss, etc. | 212 | 0.0 | 5.9 | 1.2 | -1.3 | 1.2 |
| 6d | Buy something for child | 212 | 0.0 | 3.8 | 1.7 | 0.4 | -1.0 |
| 6e | Give an extra privilege | 212 | 0.0 | 3.9 | 1.6 | 0.3 | -0.8 |
| 6f | Give points or stars on chart | 212 | 0.0 | 1.9 | 1.5 | 1.8 | 2.6 |
| 8b | Small gift/privilege last 2 days | 212 | 0.0 | 2.4 | 1.4 | 1.2 | 1.2 |
| 9aR | Rewards are bribery | 212 | 0.0 | 4.7 | 1.9 | -0.4 | -1.2 |
| 9bR | Should not have to reward | 212 | 0.0 | 4.2 | 1.9 | -0.1 | -1.3 |
| 9c | Believe in reward | 211 | 0.0 | 4.8 | 1.7 | -0.8 | -0.4 |
| 9g | Important to set up rewards or privileges | 212 | 0.0 | 3.9 | 1.8 | -0.1 | -1.3 |
| 11d | When child goes to bed how likely praise | 212 | 0.0 | 4.6 | 1.9 | -0.4 | -1.1 |
| **Harsh & Inconsistent Discipline** | |  |  |  |  |  |  |
| 1a | Misbehave: ignore it | 213 | 0.0 | 2.2 | 1.3 | 1.3 | 1.9 |
| 1b | Misbehave: raise your voice | 213 | 0.0 | 4.4 | 1.5 | -0.2 | -1.1 |
| 1d | Misbehave: threaten but do not punish | 213 | 0.0 | 3.7 | 1.8 | 0.2 | -1.1 |
| 2b | Hit another child: raise your voice | 213 | 0.0 | 4.0 | 1.9 | -0.1 | -1.1 |
| 2d | Hit another child: threaten but do not punish | 212 | 0.0 | 2.9 | 1.8 | 0.7 | -0.7 |
| 3a | Refuse to do something: ignore it | 213 | 0.0 | 1.8 | 1.3 | 2.3 | 5.4 |
| 3b | Refuse to do something: raise your voice | 213 | 0.0 | 4.3 | 1.8 | -0.2 | -1.0 |
| 3d | Refuse to do something: threaten but do not punish | 212 | 0.0 | 3.5 | 1.9 | 0.2 | -1.2 |
| 5a | Give up | 212 | 0.0 | 2.9 | 1.4 | 0.9 | 0.5 |
| 5c | Child gets away with things | 212 | 0.0 | 3.4 | 1.5 | 0.6 | -0.5 |
| 5d | Change your mind | 211 | 0.0 | 3.1 | 1.5 | 0.9 | 0.2 |
| 5e | Show anger when disciplining | 212 | 0.0 | 3.5 | 1.7 | 0.5 | -0.8 |
| 5f | Say things you do not mean to | 212 | 0.0 | 3.0 | 1.6 | 0.9 | -0.2 |
| 5g | Child gets around rules | 211 | 0.0 | 3.5 | 1.5 | 0.6 | -0.6 |
| 5h | Punishment depends on your mood | 212 | 0.0 | 2.6 | 1.5 | 1.1 | 0.6 |
| **Physical Punishment** | |  |  |  |  |  |  |
| 1h | Misbehave: spanking | 213 | 0.0 | 2.1 | 1.0 | 1.3 | 3.1 |
| 1i | Misbehave: slap or hit child | 213 | 0.0 | 1.4 | 0.7 | 2.6 | 10.3 |
| 2h | Hit another child: spanking | 212 | 0.0 | 1.9 | 1.4 | 1.9 | 2.9 |
| 2i | Hit another child: slap or hit child | 213 | 0.0 | 1.2 | 0.5 | 3.3 | 12.6 |
| 3h | Refuse to do something: spanking | 213 | 0.0 | 2.0 | 1.5 | 1.8 | 2.5 |
| 3i | Refuse to do something: slap or hit child | 213 | 0.0 | 1.2 | 0.7 | 4.2 | 21.8 |
| **Clear Expectations** | |  |  |  |  |  |  |
| 1j | Misbehave: extra work chores | 213 | 0.0 | 2.0 | 1.2 | 1.4 | 2.4 |
| 2j | Hit another child: extra work chores | 212 | 0.0 | 2.1 | 1.5 | 1.5 | 1.6 |
| 3j | Refuse to do something: extra work chores | 213 | 0.0 | 2.0 | 1.4 | 1.5 | 1.6 |
| 10a | Clear rules about chores | 211 | 0.0 | 5.1 | 1.6 | -1.0 | 0.2 |
| 10b | Clear rules about not fighting | 212 | 0.0 | 5.7 | 1.6 | -1.6 | 1.8 |
| 10c | Clear rules about going to bed and getting up | 212 | 0.0 | 5.6 | 1.4 | -1.6 | 2.5 |
| **Monitoring** | |  |  |  |  |  |  |
| 12R | Child without home supervision last 24h | 175 | 0.2 | 6.8 | 0.9 | -4.6 | 22.2 |
| 13R | Activities outside home without supervision last 2 days | 175 | 0.2 | 6.8 | 0.7 | -4.9 | 25.4 |
| 14a | % time know where your child is | 176 | 0.2 | 6.7 | 1.1 | -4.1 | 17.1 |
| 14b | % time know what your child is doing | 176 | 0.2 | 6.1 | 1.3 | -2.0 | 5.0 |
| 15c | Give children lots of unsupervised time | 175 | 0.2 | 5.2 | 1.6 | -0.9 | -0.1 |
